# Supplementary material
Source: Elsevier journal article supplement (https://www.sciencedirect.com/science/article/pii/S1579212915004413)
Supplement: mmc1 [file S1579212915004413:mmc1.docx]

**SUPLEMENTO ONLINE.**

**Tabla 1S. Características y resultados de los estudios de comparación directa entre la EBUS-TBNA y la mediastinoscopia para la estadificación mediastínica del cáncer de pulmón.**

| **Autor, año** | **Diseño** | **Nº de pacientes** | **S (%)** | | **RPN** | |
| --- | --- | --- | --- | --- | --- | --- |
| **EBUS** | **MED.** | **EBUS** | **MED.** |
| Ernst, 2008 (26) | Prospectivo1 | 66 | 87 | 68 | 0,13 | 0,32 |
| Yasufuku, 20111 (27) | Prospectivo1 | 153 | 813 | 793 | 0,193 | 0,213 |
| Um, 20115 (28) | Prospectivo2 | 127 | 88 | 81 | 0,12 | 0,19 |

MED.= Mediastinoscopia.

S = Sensibilidad

RPN = Razón de probabilidad negativa

1EBUS y mediastinoscopia realizadas el mismo día y en quirófano

2EBUS realizado en sala de broncoscopias y en días previos a la mediastinoscopia

3Diferencias no significativas
