# Supplementary material
Source: Elsevier journal article supplement (https://www.sciencedirect.com/science/article/pii/S1579212915004413)
Supplement: mmc2 [file S1579212915004413:mmc2.docx]

**Tabla 2S. Estadificación mediastínica en el cáncer de pulmón no microcítico según las guías de práctica clínica.**

|  | **SEPAR, 2011** (22) | **ACCP, 2013** (21) | **ESTS, 2014** (23) |
| --- | --- | --- | --- |
| Adenopatía aumentada de tamaño1 | + | + | + |
| Adenopatía hipercaptante en el PET | + | + | + |
| Tumor central | + | + | + |
| Sospecha de N1 | + | + | + |
| Tumor con escasa captación en el PET | + | - | - |
| Tumor > 3 cm (sobre todo si adenocarcinoma hipercaptante en PET) | - | - | + |

SEPAR = Sociedad Española de Patología Respiratoria

ACCP = American College of Chest Phisicians

ESTS = European Society of Thoracic Surgeons

115 mm para la SEPAR y 10 mm para la ACCP y la ESTS.

+ = Se recomienda EBUS-TBNA/EUS-FNA como primera técnica a realizar

- = No se recomienda EBUS-TBNA/EUS-FNA

EBUS-TBNA/EUS-FNA seguido de resección quirúrgica si las adenopatías son negativas

EBUS-TBNA/EUS-FNA seguido de estadificación quirúrgica si las adenopatías son negativas

EBUS-TBNA/EUS-FNA seguido de estadificación quirúrgica si las adenopatías son negativas y existe escasa probabilidad de afectación mediastínica
