# Supplementary material
Source: Elsevier journal article supplement (https://www.sciencedirect.com/science/article/pii/S1579212915004413)
Supplement: mmc3 [file S1579212915004413:mmc3.docx]

**s**

**Tabla 3S. Resumen de los resultados de los estudios de coste-beneficio de la EBUS-TBNA para el diagnóstico y estadificación del cáncer de pulmón**.

| **Autor, año** | **País** | **Principales resultados de los estudios de coste-beneficio** |
| --- | --- | --- |
| Kunst, 2008 (78) | Países Bajos, Alemania | TBNAc + EBUS-TBNA = 450 €/paciente  EBUS-TBNA = 701 €/paciente  Mediastinocopia= 1620 €/paciente |
| Medford, 2009 (79) | Reino Unido | Ahorro de 107824 £/año en el Hospital de Greenfield |
| Harewood, 2010 (80) | Estados Unidos | EBUS-TBNA + EUS-FNA es la estrategia más económica para prevalencias de malignidad >33% |
| Steinfort, 2010 (52) | Australia | EBUS-TBNA = 2961 AU$/paciente  TBNAc = 3754 AU$/paciente  Mediastinocopia = 8859 AU$/paciente |
| Ang, 2010 (81) | Singapur | EBUS-TBNA supuso un ahorro del 25% de los costes frente a la estadificación quirúrgica |
| Sharples, 2012 (82) | Reino Unido | EBUS-TBNA seguida de cirugía = 9713 £/paciente  Cirugía únicamente = 10459 £/paciente |
| Andrade, 2014 (83) | Estados Unidos | EBUS-TBNA un 6,2% más costoso que la mediastinoscopia (ambos bajo anestesia general en quirófano) |

TBNAc = punción transbronquial convencional
